# Supplementary material
Source: PubMed Central journal article supplement (PMC6565366)
Supplement: NIHMS1526807-supplement-3.pdf [file NIHMS1526807-supplement-3.pdf]

**A**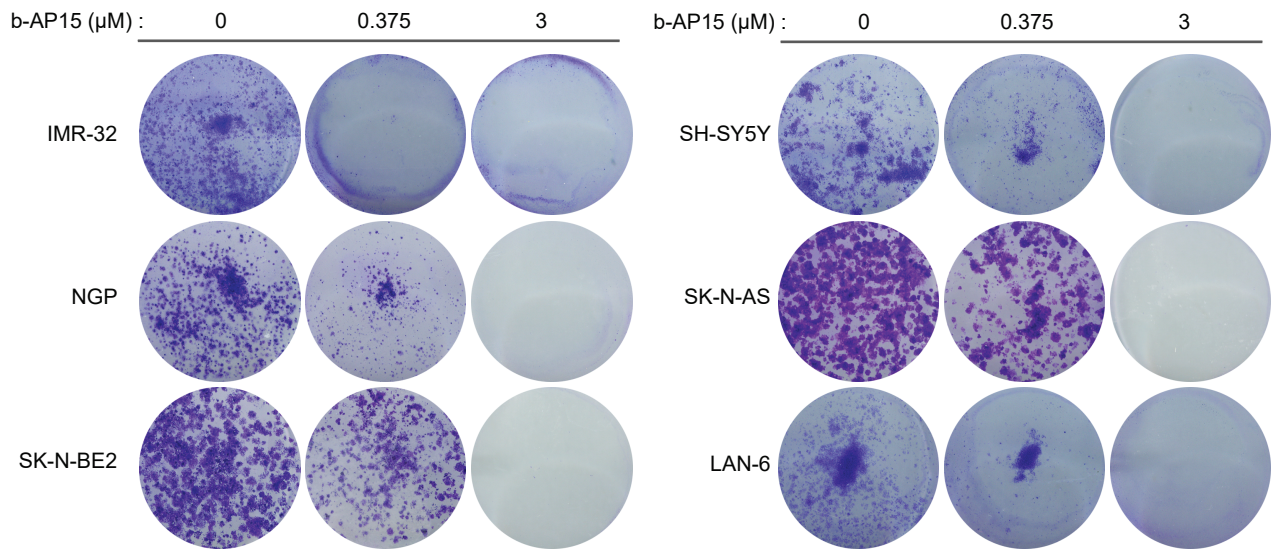**B**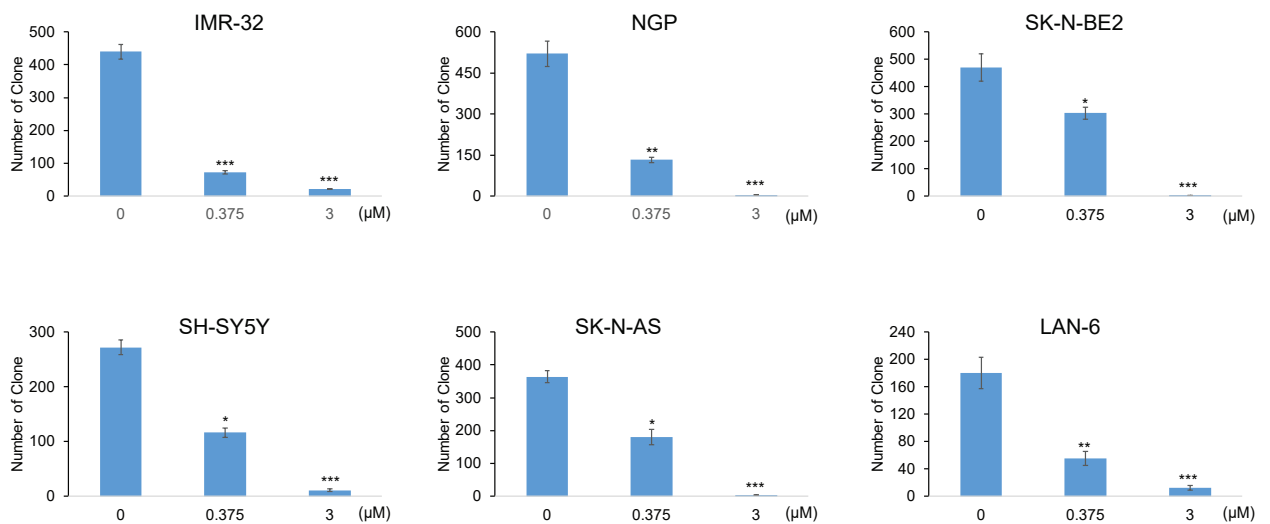

**Supplementary Fig. S3: USP14 inhibitor b-AP15 inhibits colony formation in neuroblastoma cells.** A clonogenic assay was used to determine the effect of b-AP15 on colony formation in six neuroblastoma cell lines. Cells were plated into 12-well plates ( $1 \times 10^3$  per well), and incubated with medium alone or with b-AP15 (0.375  $\mu\text{M}$  or 3  $\mu\text{M}$ ) for 24 hours, and then were cultured in drug free medium for 2 weeks. The cell colonies were stained with crystal violet. B. Clone numbers were quantified. These experiments were performed in triplicate and reported as mean with SDs. \* $P < 0.05$ , \*\* $P < 0.01$ , and \*\*\* $P < 0.001$ .
